# Supplementary material
Source: PubMed Central journal article supplement (PMC3012481)
Supplement: 1015550107_pnas.201015550SI.pdf [file 1015550107_pnas.201015550SI.pdf]

# Supporting Information

Adida et al. 10.1073/pnas.1015550107

Table S1. Regression table for Fig. 1

| Variables                       | Model 1          |              | Model 2       |              | Model 3       |              |
|---------------------------------|------------------|--------------|---------------|--------------|---------------|--------------|
|                                 | Coefficient      | SE           | Coefficient   | SE           | Coefficient   | SE           |
| Female                          | -0.176***        | 0.041        | -0.186***     | 0.042        | -0.186***     | 0.043        |
| Age                             | -0.027***        | 0.003        | -0.030***     | 0.003        | -0.027***     | 0.005        |
| Education                       | 0.227***         | 0.014        | 0.230***      | 0.017        | 0.237***      | 0.018        |
| Jewish                          | 0.339**          | 0.165        | 0.499**       | 0.202        | 0.483***      | 0.171        |
| Asian religion                  | -0.136           | 0.138        | -0.396*       | 0.208        | -0.232        | 0.185        |
| Atheist                         | -0.135           | 0.095        | -0.082        | 0.106        | -0.061        | 0.102        |
| <b>Muslim</b>                   | <b>-0.342***</b> | <b>0.047</b> | <b>-0.173</b> | <b>0.107</b> | <b>-0.116</b> | <b>0.092</b> |
| No. years in France             | 0.008***         | 0.002        | 0.008***      | 0.002        | 0.005*        | 0.003        |
| Country-of-origin fixed effects | No               |              | Yes           |              | No            |              |
| Region-of-origin fixed effects  | No               |              | No            |              | Yes           |              |
| Pseudo- $R^2$                   | 0.050            |              | 0.063         |              | 0.054         |              |
| Observations                    | 2,645            |              | 2,645         |              | 2,655         |              |

We highlight in bold the change in the significance of our Muslim coefficient when we include country and/or region fixed effects. Significance levels: \* $P \leq 0.10$ ; \*\* $P \leq 0.05$ ; \*\*\* $P \leq 0.01$ .

Table S2. Descriptive statistics for variables in Fig. 3

| Variable                       | Observations | Mean | SD   | Minimum | Maximum |
|--------------------------------|--------------|------|------|---------|---------|
| Household monthly income       | 461          | 5.15 | 1.66 | 1       | 9       |
|                                | 312          | 5.10 | 1.64 | 1       | 9       |
| Christian household            | 509          | 0.29 | 0.45 | 0       | 1       |
|                                | 312          | 0.32 | 0.47 | 0       | 1       |
| Head of household's gender     | 439          | 0.67 | 0.47 | 0       | 1       |
|                                | 312          | 0.65 | 0.48 | 0       | 1       |
| Head of household's education  | 400          | 4.63 | 2.63 | 1       | 8       |
|                                | 312          | 4.74 | 2.68 | 1       | 8       |
| Education of the first migrant | 397          | 3.00 | 1.82 | 1       | 6       |
|                                | 312          | 3.02 | 1.85 | 1       | 6       |

For each variable, the first row presents descriptive statistics over the whole sample ( $n = 511$ ), whereas the second row presents descriptive statistics over the regression sample used in Fig. 3 ( $n = 312$ ).

Table S3. Difference-of-means tests for Fig. 2

|                                              | Marie/Khadija Diouf | Aurélie Ménard     |
|----------------------------------------------|---------------------|--------------------|
| Positive response rate: Aurélie/Marie pair   | 0.21 ( $n = 138$ )  | 0.27 ( $n = 138$ ) |
| Positive response rate: Aurélie/Khadija pair | 0.08 ( $n = 133$ )  | 0.25 ( $n = 133$ ) |
| Difference                                   | 0.13***             | 0.02               |

Significance level: \*\*\* $P \leq 0.01$ .

**Table S4. Regression table for Fig. 3**

| Variable                               | Coefficient | SE    |
|----------------------------------------|-------------|-------|
| Christian household                    | 0.357***    | 0.127 |
| Gender of head of household            | 0.293***    | 0.120 |
| Educational level of head of household | 0.055**     | 0.025 |
| Educational level of first migrant     | 0.022       | 0.035 |
| Pseudo- $R^2$                          | 0.017       |       |
| Observations                           | 312         |       |

The dependent variable is an ordinal variable ranging from the value "1" if the monthly household income is lower than 500 Euros to "9" if the monthly household income is greater than 7,500 Euros. "Christian household" is a binary variable, which takes the value "1" if the household is Christian and "0" if the household is Muslim. "Gender of head of household" is a binary variable, which takes the value "1" if the head of household is male and "0" if the head of household is female. The educational level of the head of household controls for the level of education of the head of household. This is an ordinal variable ranging from the value "1" for no schooling to "8" for postsecondary education. The variable "Educational level of first migrant" controls for the level of education of the head of household's ancestor who was the first to migrate to France, and thus absorbs the differences in current family income attributable to initial differences in human capital. This is an ordinal variable ranging from the value "1" for no schooling to "6" for postsecondary education. Results hold when we control for the subject's ethnicity. SEs are robust. The regression analyzes 312 observations, and the pseudo- $R^2$  is 0.017. Significance levels: \*\* $P \leq 0.05$ ; \*\*\* $P \leq 0.01$ .

## Other Supporting Information Files

[Dataset S1 \(XLS\)](#)

[Dataset S2 \(XLS\)](#)

[Dataset S3 \(XLS\)](#)
